# Supplementary material for: Cancer Reduces Transcriptome Specialization
Source: PLOS journal article supplement (doi:10.1371/journal.pone.0010398), 2010-05-03
Supplement: S18 (10.1371/journal.pone.0010398.s018) [file journal.pone.0010398.s018]

| <b>Comparison</b>    | <b>Difference</b> | <b>S(Difference)</b> | <b>Lower limit</b> | <b>Upper limit</b> | <b>Shapiro P</b> |
|----------------------|-------------------|----------------------|--------------------|--------------------|------------------|
| Eye – EyeC           | -0.0658           | 0.0110               | -0.0873            | -0.0446            | 0.8456           |
| Lymphr – LymphrC     | 0.0695            | 0.0095               | 0.0505             | 0.0876             | 0.5590           |
| Lymph – LymphC       | 0.4554            | 0.0178               | 0.4214             | 0.4920             | 0.1441           |
| Skin – SkinC         | 0.4614            | 0.0153               | 0.4311             | 0.4903             | 0.1737           |
| Kidney – KidneyC     | 0.5391            | 0.0160               | 0.5098             | 0.5704             | 0.0840           |
| Lung – LungC         | 0.6278            | 0.0115               | 0.6053             | 0.6508             | 0.4258           |
| Prostate – ProstateC | 0.6300            | 0.0172               | 0.5958             | 0.6640             | 0.1596           |
| Muscle – MuscleC     | 0.8404            | 0.0172               | 0.8067             | 0.8740             | 0.9142           |
| Bone – CONEC         | 0.8925            | 0.0208               | 0.8519             | 0.9332             | 0.7187           |
| Placenta – PlacentaC | 0.9725            | 0.0109               | 0.9518             | 0.9939             | 0.5251           |
| Testis – TestisC     | 1.0744            | 0.0138               | 1.0473             | 1.1020             | 0.6552           |
| Liver – LiverC       | 1.4559            | 0.0176               | 1.4213             | 1.4894             | 0.2792           |

S(Difference) – Standard deviation of the difference; Lower and Upper limits are approximate 99% limits for the true difference obtained by the Bootstrap Percentile Interval method. Shapiro P – Probability of the Shapiro-Wilks test for normality of the differences.
