# Supplementary material for: Cancer Reduces Transcriptome Specialization
Source: PLOS journal article supplement (doi:10.1371/journal.pone.0010398), 2010-05-03
Supplement: S32 (10.1371/journal.pone.0010398.s032) [file journal.pone.0010398.s032]

Table S18  
Classifications by Gene Ontology for the genes presented in Table 2

| Organ           | Gene   | Biological process             | Molecular function            | Cellular component           |
|-----------------|--------|--------------------------------|-------------------------------|------------------------------|
| <i>Eye</i>      | OTX2   | Cell fate specification        | Transcription factor activity | Nucleus                      |
| <i>Liver</i>    | ASGR2  | Endocytosis                    | Binding                       | Membrane                     |
| <i>Lung</i>     | T      | Vasculogenesis                 | Transcription factor activity | Nucleus                      |
| <i>Lymph</i>    | C4orf7 | Not available                  | Not available                 | Not available                |
| <i>Limphr</i>   | IL9R   | Signal transduction            | Receptor activity             | Membrane                     |
| <i>Placenta</i> | DNMT3L | In utero embryonic development | Enzyme activator activity     | Condensed nuclear chromosome |
| <i>Skin</i>     | MLANA  | Not available                  | Not available                 | Integral to plasma membrane  |
